# Supplementary material for: Temperature-dependent selectivity of bead-like TeO2 nanostructured gas sensors
Source: Royal Society of Chemistry journal article supplement (doi:10.1039/c5ra12263e), 2015-01-01
Supplement: c5ra12263e1.pdf [file c5ra12263e1.pdf]

## Supplementary Information

### Temperature-dependent selectivity of bead-like TeO<sub>2</sub> nanostructured gas sensors

Sun-Woo Choi<sup>a</sup>, and Changhyun Jin<sup>\*b</sup>

*<sup>a</sup>Sensor System Research Center, Korea Institute of Science and Technology, 14-gil 5  
Hwarang-ro, Seongbuk-gu, Seoul 136-791, Republic of Korea.*

*<sup>b</sup>School of Mechanical Engineering, Konkuk University, 120 Neungdong-ro, Gwangjin-gu,  
Seoul 143-701, Republic of Korea.*

\* Corresponding author: *E-mail address: [jinch@konkuk.ac.kr](mailto:jinch@konkuk.ac.kr); Fax: +82 2 450 3482; Tel:  
+82 2 447 5886*

Table S1. Comparison of sensing properties of p-TeO<sub>2</sub> NWs' with those of p-type nanostructured materials-based sensors.

| Materials                                         | Gas species                      | Concentration (ppm) | Temperature (°C) | Response (R <sub>a</sub> /R <sub>g</sub> or R <sub>g</sub> /R <sub>a</sub> ) | Reference |
|---------------------------------------------------|----------------------------------|---------------------|------------------|------------------------------------------------------------------------------|-----------|
| TeO <sub>2</sub> nanowires                        | C <sub>2</sub> H <sub>5</sub> OH | 200                 | 250              | 7.45                                                                         | This work |
| hollow Co <sub>3</sub> O <sub>4</sub> nanospheres | C <sub>2</sub> H <sub>5</sub> OH | 1000                | 100              | 6.3                                                                          | 1         |
| Single CuO nanowire                               | C <sub>2</sub> H <sub>5</sub> OH | 500                 | 200              | 1.6                                                                          | 2         |
| Hollow NiO hemispheres                            | C <sub>2</sub> H <sub>5</sub> OH | 200                 | 300              | 5                                                                            | 3         |
| Porous Co <sub>3</sub> O <sub>4</sub> nanorods    | C <sub>2</sub> H <sub>5</sub> OH | 20552               | 300              | 1036 %<br>(ΔR/R <sub>0</sub> )×100                                           | 4         |
| NiO nanowires                                     | C <sub>2</sub> H <sub>5</sub> OH | 1000                | R.T.             | 7 %<br>(ΔG/G <sub>0</sub> )×100                                              | 5         |

## References

1. J. Park, X. Shen, G. Wang, *Sens. Actuators B*, 2009, **136**, 494-498.
2. L. Liao, Z. Zhang, B. Yan, Z. Zheng, Q. L. Bao, T. Wu, C. M. Li, Z. X. Shen, J. X. Zhang, H. Gong, J. C. Li, T. Yu, *Nanotechnology*, 2009, **20**, 085203.
3. N. G. Cho, I.-S. Hwang, H.-G. Kim, J.-H. Lee, I.-D. Kim, *Sens. Actuators B*, 2011, **155**, 366-371.
4. H. Nguyen, S. A. El-Safty, *J. Phys. Chem. C*, 2011, **115**, 8466-8474.
5. J. Wang, L. Wei, L. Zhang, C. Jiang, E. S.-W. Kong, Y. Zhang, *J. Mater. Chem.*, 2012, **22**, 8327-8335.

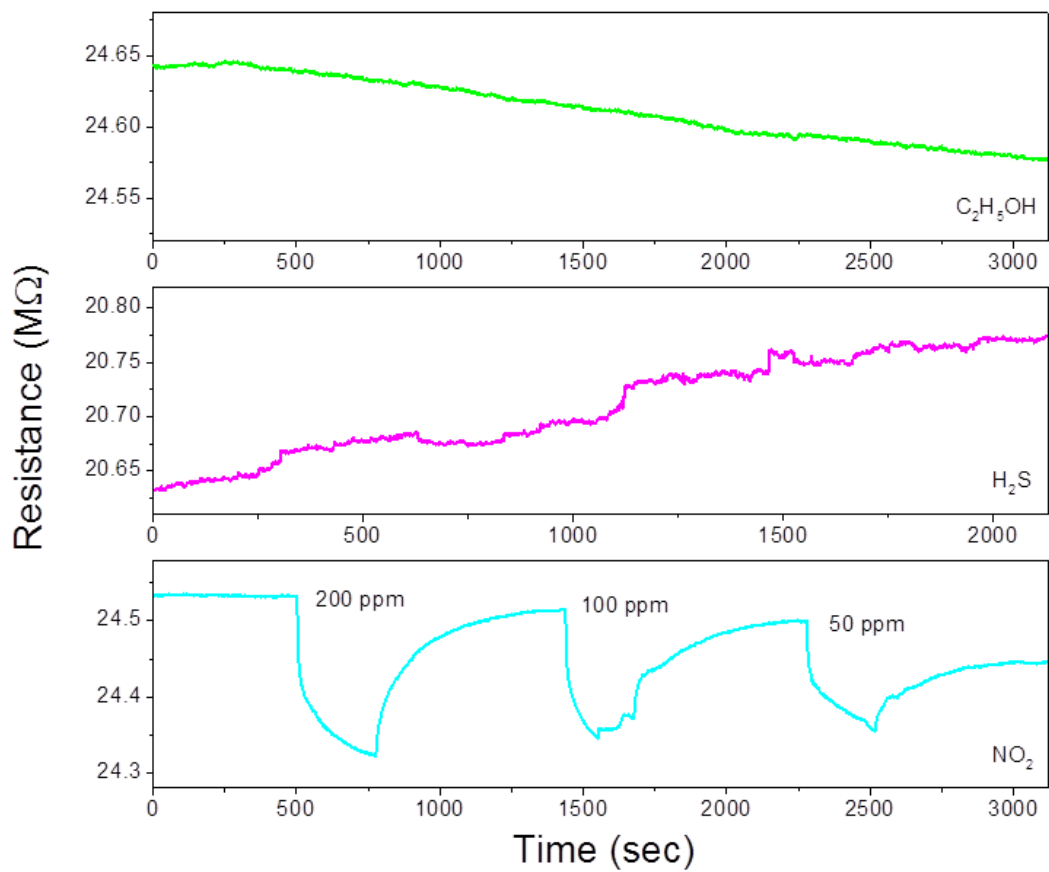

**Fig. S1** Response curves of p-TeO<sub>2</sub> NWs for C<sub>2</sub>H<sub>5</sub>OH, H<sub>2</sub>S, and NO<sub>2</sub> at room temperature.

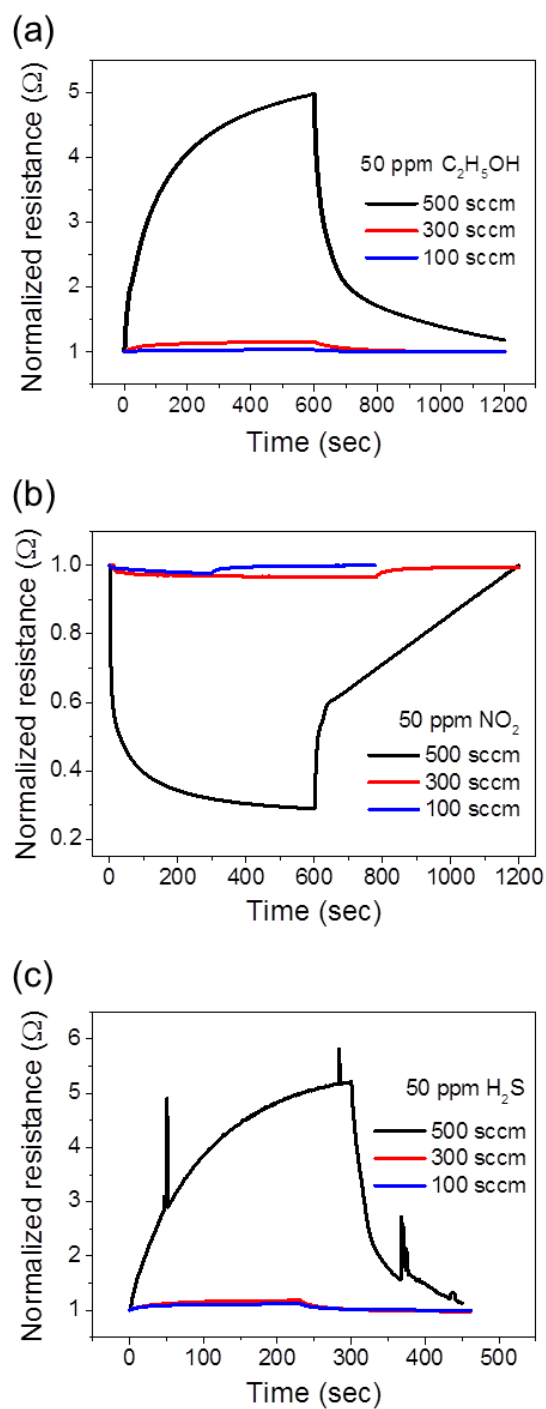

**Fig. S2** Response to the gas flow rate of (a) C<sub>2</sub>H<sub>5</sub>OH, (b) NO<sub>2</sub>, and (c) H<sub>2</sub>S at 250, 350, and 400 °C, respectively.
